# Supplementary material
Source: HighWire-hosted journal article supplement (http://www.cmaj.ca/highwire/filestream/57692/field_highwire_adjunct_files/0/newly-booth-appendix_1.pdf)
Supplement: newly-booth-appendix_1.pdf [file newly-booth-appendix_1.pdf]

**Appendix 1 (as supplied by the author). Diagnostic and procedure codes used to identify study variables**

| Variable                                                                                                      | ICD-9 diagnostic code(s)                                                                                                                                                             | ICD-10 diagnostic code(s)                                                                                                                     | Physicians' service claims (OHIP) codes                                                                                  | Procedure codes*                                                                                                                                                                                                                                                                                                            |
|---------------------------------------------------------------------------------------------------------------|--------------------------------------------------------------------------------------------------------------------------------------------------------------------------------------|-----------------------------------------------------------------------------------------------------------------------------------------------|--------------------------------------------------------------------------------------------------------------------------|-----------------------------------------------------------------------------------------------------------------------------------------------------------------------------------------------------------------------------------------------------------------------------------------------------------------------------|
| <i>Exclusion criteria: pre-existing liver disease or an alcohol-related condition<sup>†</sup></i>             | 570.x-573.x, 456.0-456.21, 996.82, 155.0, 155.2, 230.8, 782.4, 070.x, 291.x, 303.x, 305.0-305.03, 357.5, 425.5, 535.3, 535.31, 760.71, 790.3, 977.3, 980.x V42.7, V1007, V113, V79.1 | K70.X-77.X, I85.X, I86.4, I98.2, R17.X, B15.X-19.X, Z72.1, Z13.3, F10.x, G62.1, I42.6, K29.2, P04.3, R78.X, T51.X, Z71.4, Z50.2, G31.2, Z86.4 | Diagnostic codes: 571, 573, 155, 230, 787, 573, 070, 303, 291<br><br>Fee codes: E765, G254, S275, S294, S295, Z551, Z554 | CCP: 62.x<br>CCI: 10A13LAAG, 10A13LAW2, 10A13LAW3, 10A13LAX7, 10A13LAXXE, 10A13LAXXN, 10A16HAT9, 10A35H.X, 10A52H.X, 10A52LA, 10A58WLXX.X, 10A58LAXXK, 10A59DAAD, 10A59DAAG, 10A59DAGX, 10A59DAX7, 10A59HAX7, 10A59LAAD, 10A59LAAG, 10A59LAGX, 10A59LAX7, 10A74LA, 10A85LAXXK, 10A85VCXXK, 10A85WLXX.X, 10A87LA.X, 20A71.X, |
| <i>Censoring criteria: viral hepatitis, alcoholic liver disease, biliary cirrhosis or toxic liver failure</i> | 070.x, 573.1<br>571.0-571.3<br>571.6                                                                                                                                                 | B15.X-19.X<br>K70, K71.1<br>K74.3-K74.5                                                                                                       | 070                                                                                                                      | --                                                                                                                                                                                                                                                                                                                          |
| <i>Outcome: serious liver disease</i>                                                                         |                                                                                                                                                                                      |                                                                                                                                               |                                                                                                                          |                                                                                                                                                                                                                                                                                                                             |
| Liver cirrhosis                                                                                               | 571.15                                                                                                                                                                               | K71.7, K74.0-K74.2, K74.6                                                                                                                     | --                                                                                                                       | --                                                                                                                                                                                                                                                                                                                          |
| Liver failure and its sequelae                                                                                | 570.0, 572.2-572.8, 456.0-456.21                                                                                                                                                     | K72, K76.6, K76.7                                                                                                                             | --                                                                                                                       | --                                                                                                                                                                                                                                                                                                                          |
| Liver transplant                                                                                              | V42.7, 996.82                                                                                                                                                                        | --                                                                                                                                            | Fee codes: G254, S294, S295                                                                                              | CCP: 62.4x<br>CCI: 10A85LAXXK, 10A85VCXXK, 10A85WLXXJ, 10A85WLXXK                                                                                                                                                                                                                                                           |
| <i>Metabolic syndrome features</i>                                                                            |                                                                                                                                                                                      |                                                                                                                                               |                                                                                                                          |                                                                                                                                                                                                                                                                                                                             |
| Obesity                                                                                                       | 278.0                                                                                                                                                                                | E66.X                                                                                                                                         | 278                                                                                                                      | --                                                                                                                                                                                                                                                                                                                          |
| Dyslipidemia                                                                                                  | 272.0-272.5                                                                                                                                                                          | E78.X                                                                                                                                         | 272                                                                                                                      | --                                                                                                                                                                                                                                                                                                                          |
| Arterial hypertension**                                                                                       | 401.X-405.X                                                                                                                                                                          | I10.X, I11.X, I12.X, I13.X, I15.X                                                                                                             | 401-403                                                                                                                  | --                                                                                                                                                                                                                                                                                                                          |

\*Indicates coding by Canadian Classification of Procedures (corresponding to ICD-9 years) or Canadian Classification of Interventions (corresponding to ICD-10 years).

\*\*Based on the algorithm by Tu et al: 2 physician billing claims or 1 hospital discharge with a diagnosis of hypertension in a 2-year period<sup>1</sup>.

CCP Canadian Classification of Procedures; CCI Canadian Classification of Health Interventions; OHIP Ontario Health Insurance Plan

<sup>†</sup> Includes alcohol abuse and medical conditions related to alcohol (e.g. alcoholic liver disease, gastritis, cardiomyopathy, dementia and polyneuropathy)

## Reference

1. Tu K, Campbell NR, Chen ZL, et al. Accuracy of administrative databases in identifying patients with hypertension. *Open Med* 2007;1:e18-26.
